# Supplementary material for: Mitochondria-targeted triphenylphosphonium-based compounds do not affect estrogen receptor α
Source: PeerJ. 2020 Mar 25;8:e8803. doi: 10.7717/peerj.8803 (PMC7102506; doi:10.7717/peerj.8803)
Supplement: File S1 — Raw data (with background subtracted) with resazurin fluorescence obtained in the experiments with MCF-7 cells. Each data point indicates individual fluorescence values (column “Fluorescence€”) for the compounds studied (column “Compound”). [file peerj-08-8803-s002.xlsx]

## Sheet: Лист1
Plate	Cells	Compound	Fluorescence 1	Fluorescence 2	Fluorescence 3	Fluorescence 4	Fluorescence 5	Fluorescence 6	Fluorescence 7	Fluorescence 8	Fluorescence 9	Fluorescence 10	Fluorescence 11	Fluorescence 12	Fluorescence 13	Fluorescence 14	Fluorescence 15	Fluorescence 16
A1	MCF-7	Vehicle	315	315	299	334	479	375	349	389
A1	MCF-7	SkQR1 0.2	461	443	454	407	390
A1	MCF-7	SkQR1 2	422	462	392	393	388
A1	MCF-7	SkQR1 20	340	389	451	348	277	352
A1	MCF-7	E2 10	786	657	593	514
A1	MCF-7	E2 10 + Fulv	449	477	407	439
A1	MCF-7	SkQR1 0.2 + Fulv	394	371	339	361
A1	MCF-7	SkQR1 2 + Fulv	290	296	327	324
A1	MCF-7	SkQR1 20 + Fulv	335	316	296	340
A2	MCF-7	Vehicle	279	337	345	360	333	317	366	404
A2	MCF-7	E2 10	560	564	533	557
A2	MCF-7	SkQ1 0.2	345	350	405	333	314
A2	MCF-7	SkQ1 2	393	349	365	361	317
A2	MCF-7	SkQ1 20	406	366	331	351	372	345
A2	MCF-7	E2 10	589	570	520	545
A2	MCF-7	SkQ1 0.2 + Fulv	274	234	206	304	297
A2	MCF-7	SkQ1 2 + Fulv	286	263	336	312	329
A2	MCF-7	SkQ1 20 + Fulv	261	280	262	307	296
B1	MCF-7	Vehicle	328	302	302	307	312	283	270	299	314	332
B1	MCF-7	E2 10	380	431	403	378
B1	MCF-7	E2 10 + Fulv	311	350	307	264
B1	MCF-7	SkQR1 0.2	416	311	420	398
B1	MCF-7	SkQR1 2	377	367	351	367
B1	MCF-7	SkQR1 20	392	421	380	434
B1	MCF-7	SkQR1 0.2 + Fulv	349	342	357	364
B1	MCF-7	SkQR1 2 + Fulv	357	370	362	349
B1	MCF-7	SkQR1 20 + Fulv	335	329	363	324
B2	MCF-7	Vehicle	303	294	292	305	301	314	365	339	313	376
B2	MCF-7	SkQ1 0.2	397	427	404	345
B2	MCF-7	SkQ1 2	356	375	369	343
B2	MCF-7	SkQ1 20	391	381	412	375
B2	MCF-7	SkQ1 0.2 + Fulv	376	340	336	370
B2	MCF-7	SkQ1 2 + Fulv	334	344	331	332
B2	MCF-7	SkQ1 20 + Fulv	297	308	308	297
B2	MCF-7	DNP 12	387	376	383	351	353
B3	MCF-7	Vehicle	295	280	234	291	268	276	327	282	322	344
B3	MCF-7	C12TPP 0.2	382	404	379	381
B3	MCF-7	C12TPP 2	340	324	307	336
B3	MCF-7	C12TPP 20	381	334	375	319
B3	MCF-7	E2 10	340	352	425	346
B3	MCF-7	E2 10 + Fulv	301	337	321	299
B3	MCF-7	C12TPP 0.2 + Fulv	311	323	318	302
B3	MCF-7	C12TPP 2 + Fulv	283	348	317	304
B3	MCF-7	C12TPP 20 + Fulv	314	294	277	321
B3	MCF-7	C12TPP 200	157	152	160	157	161
C1	MCF-7	Vehicle	388	356	395	417	348	535	527	537	514	436
C1	MCF-7	SkQR1 0.2	395	409	413	450	451
C1	MCF-7	SkQR1 0.2 + Fulv	241	215	230	264	292
C1	MCF-7	SkQR1 2	193	200	358	304	316
C1	MCF-7	SkQR1 2 + Fulv	306	280	272	220	255
C1	MCF-7	SkQR1 20	377	378	417	393	447
C1	MCF-7	SkQR1 20 + Fulv	342	380	291	307	375
C1	MCF-7	E2 10	524	525	516	584	561
C1	MCF-7	E2 10 + Fulv	220	154	169	196
C2	MCF-7	Vehicle	253	250	264	347	347	393	384	413	254	260
C2	MCF-7	SkQ1 0.2	341	390	296	318	367
C2	MCF-7	SkQ1 0.2 + Fulv	225	231	251	261	272
C2	MCF-7	SkQ1 2	261	249	213	190	228
C2	MCF-7	SkQ1 2 + Fulv	194	211	197	218	252
C2	MCF-7	SkQ1 20	229	365	373	389	423
C2	MCF-7	SkQ1 20 + Fulv	304	351	295	317	325
C2	MCF-7	SkQ1 200	140	180	174	208	342
C2	MCF-7	E2 10	522	513	473	549	565
C2	MCF-7	E2 10 + Fulv	178	181	200	211	195
C3	MCF-7	Vehicle	316	292	379	320	371	393	429	401	348	403
C3	MCF-7	C12TPP 0.2	414	439	437	412	454
C3	MCF-7	C12TPP 0.2 + Fulv	219	294	241	296	274
C3	MCF-7	C12TPP 2	184	216	369	377	383
C3	MCF-7	C12TPP 2 + Fulv	235	314	271	311	294
C3	MCF-7	C12TPP 20	379	385	412	411	403
C3	MCF-7	C12TPP 20 + Fulv	223	214	196	217	254
C3	MCF-7	C12TPP 200	109	123	204	252	307
C3	MCF-7	E2 10	523	560	570	555	568
C3	MCF-7	E2 10 + Fulv	204	189	197	204	223
D1	MCF-7	Vehicle	449	443	389	364	363	331	316	350	385	427	406	456	315	362	278
D1	MCF-7	SkQR1 0.2	307	304	306	335	413
D1	MCF-7	SkQR1 0.2 + Fulv	299	264	227	187
D1	MCF-7	SkQR1 2	350	383	366	417	409
D1	MCF-7	SkQR1 2 + Fulv	392	348	381	295	307
D1	MCF-7	SkQR1 20	481	455	447	522
D1	MCF-7	SkQR1 20 + Fulv	482	441	431	375
D1	MCF-7	E2 10	575	478	471	438	478
D2	MCF-7	Vehicle	450	382	417	398	368	372	377	388	417	468
D2	MCF-7	SkQ1 0.2	380	368	356	381	452
D2	MCF-7	SkQ1 0.2 + Fulv	309	273	290	237	257
D2	MCF-7	SkQ1 2	410	368	395	414	514
D2	MCF-7	SkQ1 2 + Fulv	370	369	341	355	376
D2	MCF-7	SkQ1 20	458	441	465	460	320
D2	MCF-7	SkQ1 20 + Fulv	347	392	315	320	387
D2	MCF-7	SkQ1 200	374	341	332	339	339
D2	MCF-7	E2 10	567	550	595	523	509
D3	MCF-7	Vehicle	467	411	434	427	435	400	447	435	481	480	440	390	431	418	488
D3	MCF-7	C12TPP 0.2	364	361	380	434	460
D3	MCF-7	C12TPP 0.2 + Fulv	378	380	339	324	361
D3	MCF-7	C12TPP 2	439	431	439	473	511
D3	MCF-7	C12TPP 2 + Fulv	470	421	390	405	390
D3	MCF-7	C12TPP 20	387	478	441	431
D3	MCF-7	C12TPP 20 + Fulv	347	298	315	330	344
D3	MCF-7	C12TPP 200	282	230	295	308	299
D3	MCF-7	E2 10	592	530	452	534	578
E1	MCF-7	Vehicle	503	488	476	435	442	382	479	398	475	547	355	456	532	574	522
E1	MCF-7	SkQR1 0.2	400	403	418	499	601
E1	MCF-7	SkQR1 0.2 + Fulv	283	327	354	287	337
E1	MCF-7	SkQR1 2	450	462	495	561	561
E1	MCF-7	SkQR1 2 + Fulv	481	441	450	512	414
E1	MCF-7	SkQR1 20	580	553	608	615	608
E1	MCF-7	SkQR1 20 + Fulv	550	472	580	503	522
E1	MCF-7	E2 10	826	628	639	671	634
E1	MCF-7	DNP 12	598	492	479	500	438
E2	MCF-7	Vehicle	542	481	451	405	494	408	397	458	503	481	593	481	455	432	460
E2	MCF-7	SkQ1 0.2	381	416	435	451	585
E2	MCF-7	SkQ1 0.2 + Fulv	319	308	367	489	471
E2	MCF-7	SkQ1 2	406	427	478	508	601
E2	MCF-7	SkQ1 2 + Fulv	413	501	420	409	479
E2	MCF-7	SkQ1 20	493	441	537	550	607
E2	MCF-7	SkQ1 20 + Fulv	504	471	450	513	471
E2	MCF-7	SkQ1 200	401	322	297	278	301
E2	MCF-7	E2 10	835	639	538	552	569
F1	MCF-7	Vehicle	498	458	431	418	396	355	449	559	397	425	423	427	547
F1	MCF-7	C12TPP 0.2	433	575	581	559	547
F1	MCF-7	C12TPP 0.2 + Fulv	395	375	391	380	372
F1	MCF-7	C12TPP 2	361	351	412	456	587
F1	MCF-7	C12TPP 2 + Fulv	452	328	391	351	438
F1	MCF-7	C12TPP 20	467	486	512	510	581
F1	MCF-7	C12TPP 20 + Fulv	507	457	462	459	503
F1	MCF-7	C12TPP 200	323	305	302	291	322
F1	MCF-7	E2 10	728	824	420	491
F2	MCF-7	Vehicle	532	566	540	536	557	446
F2	MCF-7	SkQ1 20	601	551	559	512
F2	MCF-7	SkQ1 2	568	542	536	531
F2	MCF-7	SkQ1 0.2	572	561	529	490
F2	MCF-7	C12TPP 20	547	512	453	499
F2	MCF-7	C12TPP 2	518	488	511	461	436
F2	MCF-7	C12TPP 0.2	599	535	499	443
F2	MCF-7	C12TPP 0.2 + Fulv	433	417	457	452	412
F2	MCF-7	SkQR1 0.2	565	550	510	529	535
F2	MCF-7	DNP 12	574	597	548	575
F2	MCF-7	SkQ1 20 + Fulv	360	374	403	456
F2	MCF-7	SkQR1 20 + Fulv	465	451	520	489
F2	MCF-7	E2 10	669	612	611	643
G1	MCF-7	Vehicle	562	644	502	529	519	518	538	518	564	507	585	500	554	640	598	609
G1	MCF-7	SkQR1 2	372	456	404	461	470
G1	MCF-7	SkQR1 20	494	684	473	514	621
G1	MCF-7	SkQR1 200	392	391	363	423	411
G1	MCF-7	E2 10	696	662	684	764	847
G1	MCF-7	E2 10 + Fulv	659	789	706	727	685
G1	MCF-7	SkQR1 2 + Fulv	434	340	337	362	317
G1	MCF-7	SkQR1 20 + Fulv	371	419	415	455	457	550
G1	MCF-7	SkQR1 200 + Fulv	352	333	329	379	370
H1	MCF-7	Vehicle	253	217	222	259	243	217	227	202	214	236
H1	MCF-7	SkQ1 20	237	244	243	234	226
H1	MCF-7	C12TPP 20	237	233	172	123	151
H1	MCF-7	SkQR1 20	287	242	272	243	234
H1	MCF-7	DNP 12	194	240	278	308	268
H1	MCF-7	SkQ1 20 + Fulv	200	179	207	197	161
H1	MCF-7	C12TPP 20 + Fulv	315	271	263	236	243
H1	MCF-7	SkQR1 20 + Fulv	223	237	253	278	278
H1	MCF-7	E2 10	364	281	316	313	321
H1	MCF-7	E2 10 + Fulv	330	296	338	274	262
I1	MCF-7	Vehicle	570	532	573	611	587	578	607	613
I1	MCF-7	SkQ1 20	618	599	614	606	625
I1	MCF-7	C12TPP 20	650	642	661	627	696
I1	MCF-7	SkQR1 20	619	630	625	655	642
I1	MCF-7	DNP 12	890	779	718	624	381
I1	MCF-7	SkQ1 20 + Fulv	601	528	529	521
I1	MCF-7	C12TPP 20 + Fulv	492	475	493	482
I1	MCF-7	SkQR1 20 + Fulv	633	623	651	594
I1	MCF-7	E2 10	596	673	711	738
I1	MCF-7	E2 10 + Fulv	616	721	648	661
