# Supplementary material for: Mitochondria-targeted triphenylphosphonium-based compounds do not affect estrogen receptor α
Source: PeerJ. 2020 Mar 25;8:e8803. doi: 10.7717/peerj.8803 (PMC7102506; doi:10.7717/peerj.8803)
Supplement: File S2 — Raw data (with background subtracted) with resazurin fluorescence obtained in the experiments withMDA-MB-231 cells. Each data point indicates individual fluorescence values (column “Fluorescence€”) for the compounds studied(column “Compound”). [file peerj-08-8803-s003.xlsx]

## Sheet: Лист1
Plate	Cells	Compound	Fluorescence 1	Fluorescence 2	Fluorescence 3	Fluorescence 4	Fluorescence 5	Fluorescence 6	Fluorescence 7	Fluorescence 8	Fluorescence 9	Fluorescence 10	Fluorescence 11	Fluorescence 12	Fluorescence 13	Fluorescence 14	Fluorescence 15	Fluorescence 16
M1	MDA	Vehicle	278	309	290	266	256	293
M1	MDA	SkQR1 0.2	250	270	278	230	251	241
M1	MDA	SkQR1 2	283	272	294	246	258
M1	MDA	SkQR1 20	274	253	254	278	302
M1	MDA	E2 10	237	215	247	205	248
M1	MDA	E2 10 + Fulv	241	228	247	239	242
M1	MDA	DNP 12	244	247	277	272
M1	MDA	SkQ1 0.2	301	271	283	267
M1	MDA	SkQ1 2	264	311	291	288
M1	MDA	SkQ1 20	294	267	273	265
M2	MDA	Vehicle	375	338	329	329	358	357	363	315	377	370	364
M2	MDA	SkQR1 0.2	371	366	393	442
M2	MDA	SkQR1 2	355	335	318	331	373
M2	MDA	SkQR1 20	318	357	337	353	359
M2	MDA	DNP 12	445	442	445	452	483
M2	MDA	E2 10	384	356	354	337	361
M2	MDA	E2 10 + Fulv	378	407	414	385	391
M2	MDA	Vehicle	556	502	455	379	423	427	347	357	419	459
M3	MDA	E2 10	413	431	407	398	440
M3	MDA	SkQR1 0.2	392	423	376	385	380
M3	MDA	SkQR1 2	442	340	339	308	350
M3	MDA	SkQR1 20	322	370	357	346	466
M3	MDA	C12TPP 0.2	359	350	323	310
M3	MDA	C12TPP 2	353	372	359	404
M3	MDA	C12TPP 20	516	505	455	497
M4	MDA	Vehicle	605	533	493	469	480	435	449	447	439	483	636	641	535
M4	MDA	SkQ1 0.2	422	456	428	512
M4	MDA	SkQ1 2	504	433	430	472
M4	MDA	SkQ1 20	440	466	543	553
M4	MDA	C12TPP 0.2	502	499	469	464	514	492
M4	MDA	C12TPP 2	377	393	373	383
M4	MDA	C12TPP 20	525	370	390	400	473	553	504	493
M4	MDA	DNP 12	486	521	464	535	507	498
M5	MDA	Vehicle	271	249	277	250	287	307	221	258	274	276	299
M5	MDA	SkQR1 0.2	227	210	232	343	401
M5	MDA	SkQR1 2	368	269	260	201	235
M5	MDA	SkQR1 20	273	324	307	332	370
M5	MDA	E2 10	354	238	235	302	241
M5	MDA	DNP 12	284	334	362	361
M5	MDA	SkQ1 0.2	321	290	326	328	462
M5	MDA	SkQ1 2	555	391	354	371	380
M5	MDA	SkQ1 20	307	285	326	353	403
M6	MDA	Vehicle	457	431	544	501	443	521
M6	MDA	SkQR1 0.2	547	422	432	401	433	502
M6	MDA	SkQR1 2	475	448	406	381	433	498
M6	MDA	SkQR1 20	421	476	485	429	451	526
M6	MDA	C12TPP 0.2	466	378	480	428	511	479
M6	MDA	C12TPP 2	501	413	449	415	396	537
M6	MDA	C12TPP 20	495	414	438	440	414	479
M6	MDA	E2 10	436	431	412	407	397	494
M6	MDA	E2 10 + Fulv	495	488	492	511	536	487
M7	MDA	Vehicle	307	371	382	320	275	318	380	349	369	285	375	288	397	322
M7	MDA	SkQ1 0.2	336	343	294	283	391
M7	MDA	SkQ1 2	372	348	339	334	358
M7	MDA	SkQ1 20	304	307	308	284	341
M7	MDA	C12TPP 0.2	296	375	314	315	305
M7	MDA	C12TPP 2	377	272	337	278	284
M7	MDA	C12TPP 20	282	344	280	341	314
M7	MDA	E2 10	326	361	305	299	352	351
M7	MDA	E2 10 + Fulv	323	361	362	368	300	305
