# Supplementary material for: Mitochondria-targeted triphenylphosphonium-based compounds do not affect estrogen receptor α
Source: PeerJ. 2020 Mar 25;8:e8803. doi: 10.7717/peerj.8803 (PMC7102506; doi:10.7717/peerj.8803)
Supplement: File S3 — The column “Compound” indicates the compounds studied; the column “Protein conc. mkg/mL” indicates the concentration of the proteins measured in the Bradford assay; column “Luminescence” indicates raw data obtained by measuring luminescence on a luminometer LKB 1251 using Luciferase Assay System. [file peerj-08-8803-s004.xlsx]

## Sheet: Лист1
Exp	Compound	Protein conc. mkg/mL	Luminescence
Exp1	Control	573.689	513.5
Exp1	Е2 10 nM	858.166	9802
Exp1	Е2 10 nM + Fulv	732.512	3802
Exp1	SkQR1 20 nM	946.834	997
Exp1	C12TPP 20 nM	1009.64	1020
Exp1	SkQ1 20 nM	902.5	1214
Exp2	Control	1152.97	2119
Exp2	Е2 10 nM	1257.03	13410
Exp2	Е2 10 nM + Fulv	1309.05	10780
Exp2	SkQR1 20 nM	1134.39	2225
Exp2	C12TPP 20 nM	1227.3	1367
Exp2	SkQ1 20 nM	1208.72	2707
Exp3	Control	1176.34	207.1
Exp3	Е2 10 nM	1300.28	1242.4
Exp3	Е2 10 nM + Fulv	1432.2	556.3
Exp3	SkQR1 20 nM	1188.34	117.6
Exp3	C12TPP 20 nM	780.563	128.2
Exp3	SkQ1 20 nM	1248.31	182.9
