# Supplementary material for: Mitochondria-targeted triphenylphosphonium-based compounds do not affect estrogen receptor α
Source: PeerJ. 2020 Mar 25;8:e8803. doi: 10.7717/peerj.8803 (PMC7102506; doi:10.7717/peerj.8803)
Supplement: File S4 — The column “Sample” indicates the compounds studied; the columns with gene names indicates corresponding genes; the column Ct€ indicates raw threshold data (Ct). [file peerj-08-8803-s005.xlsx]

## Sheet: Лист1
Raw data for Real-time PCR
		RPL32	RPL32	RPL32	GREB1	GREB1	GREB1	IGFBP4	IGFBP4	IGFBP4	COX6	COX6	COX6	TFF1	TFF1	TFF1
Experiment	Sample	Ct1	Ct2	Ct3	Ct1	Ct2	Ct3	Ct1	Ct2	Ct3	Ct1	Ct2	Ct3	Ct1	Ct2	Ct3
Exp1	Control	19.41	19.4	19.49	25.46	25.44	25.4	26.24	26.34	26.15	19.2	19.1	19.23	19.42	19.3	19.33
Exp1	100nM Fulv	21.29	21.42	21.23	29.49	29.29	29.3	28.16	28.06	27.98	20.98	20.95	20.88	23.13	23.13	22.95
Exp1	10 nM E2	19.37	19.38	19.34	22.16	22.14	22.04	25.42	25.12	25.17	18.47	18.34	18.29	17.25	17.03	16.92
Exp1	10nM E2 + 100nM Fulv	19.4	19.68	19.56	24.55	24.54	24.49	26.22	26.05	26.01	19.17	19.17	19.04	19.23	19.14	19.16
Exp1	0.2 nM SkQ1	19.33	19.37	19.38	25.19	25.18	25.13	26.07	25.96	25.79	19.21	19.07	18.95	19.14	18.95	18.93
Exp1	2 nM SkQ1	19.43	19.36	19.33	25.17	24.97	25.14	26.04	25.94	25.82	19.11	18.95	18.92	19.16	19.12	18.93
Exp1	20 nM SkQ1	19.51	19.47	19.53	25.27	25.17	25.3	26.26	26.15	26.15	19.26	19.33	19.3	19.43	19.32	19.22
Exp1	0.2 nM SkQ1 + 100 nM Fulv	19.91	19.81	19.89	28.27	28.22	28.25	27.35	27.39	27.4	19.68	19.7	19.72	21.54	21.52	21.47
Exp1	2 nM SkQ1 + 100 nM Fulv	19.78	19.79	19.88	28.13	28.12	28.22	27.21	27.24	27.26	19.55	19.58	19.66	21.33	21.44	21.37
Exp1	20 nM SkQ1 + 100 nM Fulv	19.75	19.72	19.84	28.06	28.09	28.16	27.29	27.02	27.16	19.65	19.63	19.72	21.27	21.3	21.36
Exp2	Control	21.15	21.15	21.22	28.99	28.82	28.89	30.05	30.1	29.96	20.6	20.63	20.63	21.98	21.84	22.89
Exp2	10 nM E2	21.17	21.16	21.18	24.74	24.67	24.68	29.13	29.07	29.03	19.95	19.77	19.91	18.87	18.85	18.94
Exp2	10nM E2 + 100nM Fulv	21.1	21.12	21.21	25.55	25.46	25.62	29.02	28.92	28.98	19.97	19.93	20.08	19.99	19.95	19.96
Exp2	2 nM SkQ1	21.29	21.3	21.34	28.58	28.7	28.62	30.57	30.47	30.27	20.7	20.72	20.74	21.94	21.88	21.97
Exp2	100nM Fulv	21.38	21.38	21.49	31.17	31.22	31.2	30.65	30.57	30.67	20.91	20.96	20.9	24.09	23.96	23.87
Exp2	0.2 nM SkQ1	23.58	23.47	23.67	32.27	32.37	32.26	31.74	31.84	31.61	21.83	21.9	21.84	25.39	25.3	25.18
Exp2	2 nM SkQ1 + 100 nM Fulv	22	22.01	22.28	31.66	31.68	31.65	30.55	30.55	30.57	21.14	21.23	21.31	24.5	24.56	24.39
Exp2	20 nM SkQ1	22.19	22.23	22.31	29.43	29.46	29.49	31.08	30.98	30.98	21.45	21.55	21.55	22.77	22.68	22.77
Exp2	0.2 nM SkQ1 + 100 nM Fulv	21.88	21.88	22.02	31.16	31.11	31.11	30.75	30.59	30.46	21.19	21.17	21.26	24.37	24.36	24.48
Exp2	20 nM SkQ1 + 100 nM Fulv	21.67	21.71	21.94	31.34	31.27	31.47	30.85	30.73	31	21.2	21.21	21.27	24.26	24.23	24.42
Exp3	Control	18.38	18.3	18.31	30.08	30.15	30.19	32.44	32.13	32.19	19.08	19.07	19.05	20.41	20.3	20.34
Exp3	10 nM E2	18.35	18.35	18.35	27.62	27.69	27.56	31.02	30.87	31.04	18.65	18.7	18.68	18.57	18.57	18.5
Exp3	10nM E2 + 100nM Fulv	19.61	19.5	19.66	30.66	30.8	30.79	32.57	32.65	32.9	19.53	19.54	19.5	20.98	20.96	21.06
Exp3	0.2 nM SkQ1	21.06	21.06	21.25	31.92	32.04	32.01	33.44	33.25	33.44	19.33	19.34	19.35	22.54	22.52	22.58
Exp3	2 nM SkQ1	20.11	20.09	20.09	31.71	31.86	32.01	32.69	32.45	32.57	19.2	19.1	19.04	21.82	21.74	21.83
Exp3	20 nM SkQ1	19.58	19.5	19.58	31.15	31.2	31.33	32.32	32.57	32.41	18.87	18.89	18.96	21.51	21.46	21.48
Exp3	0.2 nM SkQ1 + 100 nM Fulv	21.59	21.48	21.58	34.67	34.97	34.85	35.23	35.05	35.44	22.85	22.79	23	24.07	23.89	23.92
Exp3	2 nM SkQ1 + 100 nM Fulv	21.16	21.1	21.13	35.06	34.69	34.95	35.55	35.64	35.7	22.62	22.59	22.58	23.74	23.69	23.48
Exp3	20 nM SkQ1 + 100 nM Fulv	21.4	21.27	21.27	35.06	34.93	35.21	36.15	36.4	36.21	22.59	22.55	22.65	23.74	23.59	23.67
Exp3	100nM Fulv	21.2	21.18	21.14	35.12	34.99	35.25	35.44	35.66	35.48	22.71	22.55	22.75	23.7	23.75	23.65
Exp4	Control	21.46	21.34	21.43	34.04	33.89	34.09	34.97	34.96	34.84	20.9	20.87	20.94	21.57	21.39	21.4
Exp4	100nM Fulv	21.27	21.25	21.2	36.94	36.74	36.88	35.52	35.43	35.68	20.88	20.9	20.68	24.53	24.44	24.39
Exp4	10 nM E2	20.73	20.67	20.65	29.12	29.2	29.15	32.4	32.33	32.09	19.84	19.98	19.82	18.01	17.86	17.74
Exp4	10nM E2 + 100nM Fulv	21.15	21.16	21.08	29.79	29.99	29.8	32.49	32.33	32.35	20.33	20.15	20.08	19.52	19.54	19.44
Exp4	0.2 nM SkQ1	21.12	21.23	21.06	33.1	33.23	33.27	33.3	33.52	33.23	20.49	20.54	20.55	21.56	21.71	21.41
Exp4	2 nM SkQ1	21.27	21.28	21.26	32.42	32.3	32.33	32.48	32.31	32.35	20.42	20.41	20.4	21.06	21.03	21.07
Exp4	20 nM SkQ1	21.11	21.19	21.09	33.12	32.8	32.96	32.98	33.23	33.12	20.55	20.59	20.54	21.54	21.47	21.55
Exp4	0.2 nM SkQ1 + 100 nM Fulv	21.5	21.52	21.52	36.21	35.92	36	34.41	34.31	34.26	20.89	20.84	20.91	25.08	24.9	25.08
Exp4	2 nM SkQ1 + 100 nM Fulv	21.35	21.34	21.33	35.46	35.36	35.58	34.16	34.23	34.05	20.69	20.63	20.61	24.83	24.8	24.69
Exp4	20 nM SkQ1 + 100 nM Fulv	21.95	22.01	22.18	37.05	37.01	37.19	35.2	35.34	35.43	20.79	20.72	20.77	24.89	24.71	24.79
