# Supplementary material for: Mitochondria-targeted triphenylphosphonium-based compounds do not affect estrogen receptor α
Source: PeerJ. 2020 Mar 25;8:e8803. doi: 10.7717/peerj.8803 (PMC7102506; doi:10.7717/peerj.8803)
Supplement: File S5 — Raw data (with background subtracted) with resazurin fluorescence obtained in the pilot experiment with MCF-7 cells. Each data point indicates individual fluorescence values (column “Fluorescence €”) for the compounds studied (column “Compound”). [file peerj-08-8803-s006.xlsx]

## Sheet: Лист1
Plate	Cells	Compound	Fluorescence 1	Fluorescence 2	Fluorescence 3	Fluorescence 4	Fluorescence 5	Fluorescence 6	Fluorescence 7	Fluorescence 8	Fluorescence 9	Fluorescence 10	Fluorescence 11	Fluorescence 12	Fluorescence 13	Fluorescence 14	Fluorescence 15	Mean	SD	%	SD%
A1	MCF-7	Vehicle	467	411	434	427	435	400	447	435	481	480	440	390	431	418	488	438.933	29.4072	100	6.69969
A1	MCF-7	C12TPP 0.00002	452	437	394	395	486											432.8	39.2135	98.6027	9.06042
A1	MCF-7	C12TPP 0.0002	486	428	421	434	447											443.2	25.7624	100.972	5.81281
A1	MCF-7	C12TPP 0.002	399	418	437	455	446											431	22.5278	98.1926	5.22686
A1	MCF-7	C12TPP 0.02	485	461	370	397	406											423.8	47.5889	96.5522	11.2291
A1	MCF-7	C12TPP 0.2	417	414	433	487	513											452.8	44.6453	103.159	9.85982
A1	MCF-7	C12TPP 2	439	431	439	473	511											458.6	33.4784	104.481	7.30012
A1	MCF-7	C12TPP 20	487	478	441	431	479											463.2	25.3219	105.529	5.46674
A1	MCF-7	C12TPP 200	282	230	295	308	299											282.8	30.9629	64.4289	10.9487
A1	MCF-7	E2 10	592	530	452	534	578											537.2	54.7467	122.388	10.1911
A2	MCF-7	Vehicle	450	382	417	398	368	472	377	388	417	468						413.7	38.0557	100	9.19885
A2	MCF-7	SkQ1 0.00002	478	378	478	391	424											429.8	47.0872	103.892	10.9556
A2	MCF-7	SkQ1 0.0002	489	445	370	469	383											431.2	52.509	104.23	12.1774
A2	MCF-7	SkQ1 0.002	346	383	373	416	432											390	34.3293	94.2712	8.80238
A2	MCF-7	SkQ1 0.02	479	525	483	410	371											453.6	61.9096	109.645	13.6485
A2	MCF-7	SkQ1 0.2	392	368	456	401	452											413.8	38.6549	100.024	9.34144
A2	MCF-7	SkQ1 2	410	468	395	474	514											452.2	48.9816	109.306	10.8319
A2	MCF-7	SkQ1 20	458	441	465	460	370											438.8	39.5057	106.067	9.00312
A2	MCF-7	SkQ1 200	324	281	332	339	319											319	22.5721	77.109	7.0759
A2	MCF-7	E2 10	567	610	595	593	619											596.8	19.8293	144.259	3.3226
A3	MCF-7	Vehicle	449	443	389	364	363	331	316	350	385	427	406	456	315	362		382.571	47.9546	100	12.5348
A3	MCF-7	SkQR1 0.00002	352	385	414	426	420											399.4	30.8188	104.399	7.71628
A3	MCF-7	SkQR1 0.0002	442	368	333	299	355											359.4	53.0594	93.9432	14.7633
A3	MCF-7	SkQR1 0.002	317	366	346	335	421											357	39.9437	93.3159	11.1887
A3	MCF-7	SkQR1 0.02	388	320	317	320	322											333.4	30.5745	87.1471	9.17052
A3	MCF-7	SkQR1 0.2	307	344	306	335	413											341	43.6177	89.1337	12.7911
A3	MCF-7	SkQR1 2	350	383	366	417	409											385	28.24	100.635	7.33508
A3	MCF-7	SkQR1 20	481	455	447	522	419											464.8	38.8742	121.494	8.36363
A3	MCF-7	SkQR1 200	287	247	266	284	305											277.8	22.0839	72.6139	7.94958
A3	MCF-7	E2 10	575	498	471	538	478											512	43.8121	133.831	8.55705
