# Supplementary material for: Mitochondria-targeted triphenylphosphonium-based compounds do not affect estrogen receptor α
Source: PeerJ journal article supplement (doi:10.7717/peerj.8803), 2020-03-25

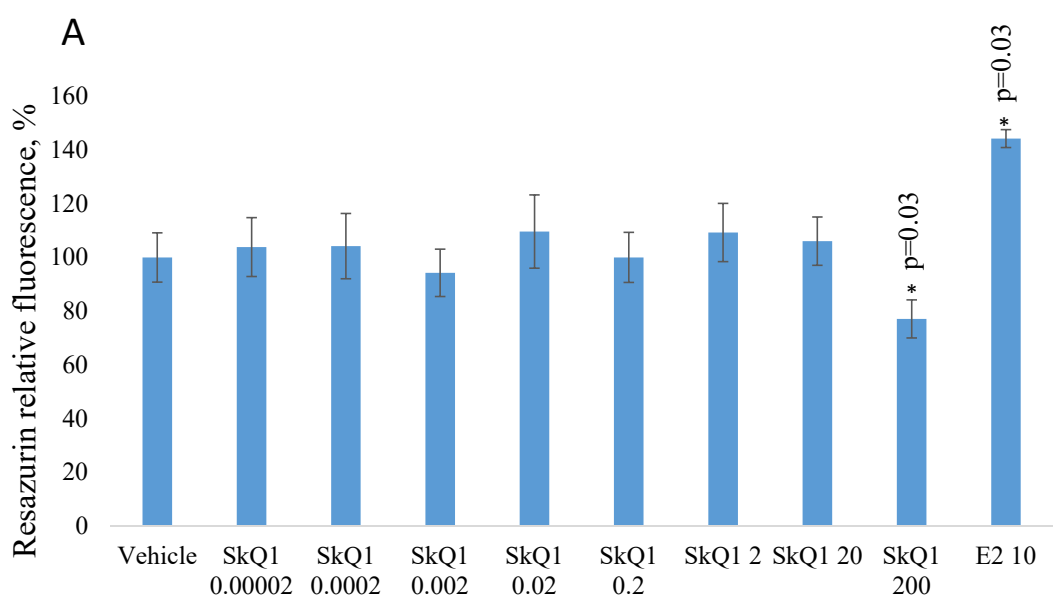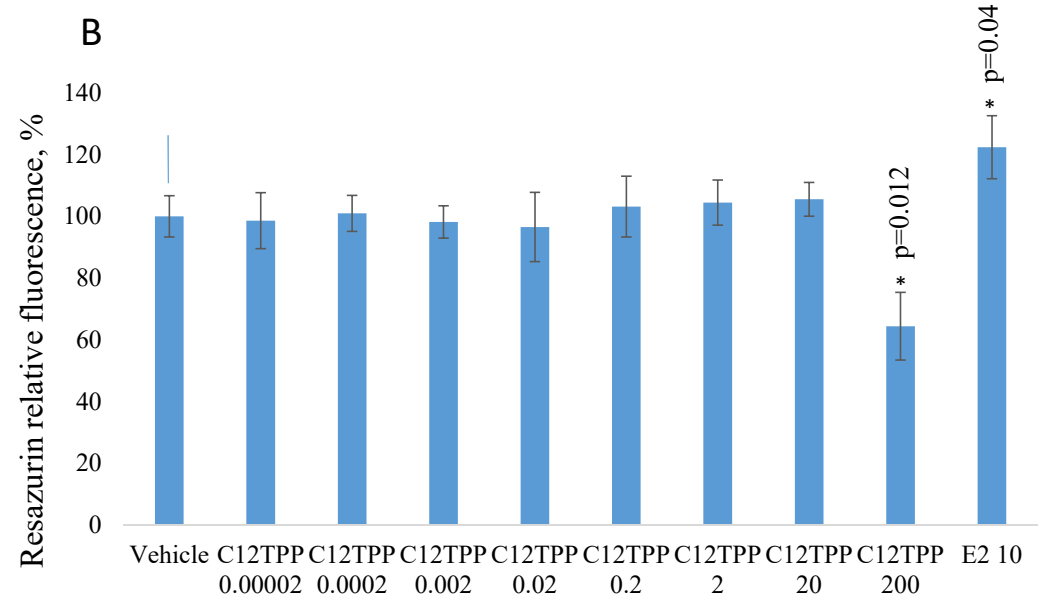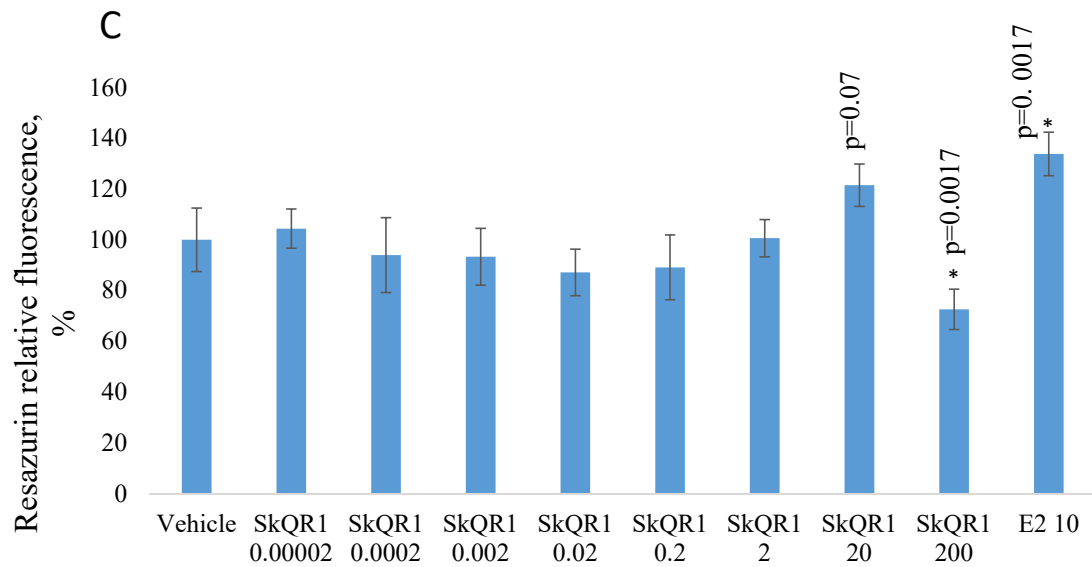

Supplement: Suppl_Fig1.pdf [file Suppl_Fig1.pdf]
