# Supplementary material for: Mitochondria-targeted triphenylphosphonium-based compounds do not affect estrogen receptor α
Source: PeerJ. 2020 Mar 25;8:e8803. doi: 10.7717/peerj.8803 (PMC7102506; doi:10.7717/peerj.8803)
Supplement: Table S1 [file peerj-08-8803-s001.xlsx]

## Sheet: Лист1
Primers used in this study.
Target gene	Primer sequence (5’-3’)
	Forward	Reverse
RPL32 (reference)	CATCTCCTTCTCGGCATCA	AACCCTGTTGTCAATGCCTC
TFF1	AAATAAGGGCTGCTGTTTC	AATTCACACTCCTCTTCTG
COX6C	GTATAAGTTTCGTGTGGCTGAT	GCCTTCCTCATCTCCTCAA
GREB1	AATATCAACCTCAGAGAAGA	TCGTGAATGATGTAGTCAA
IGFBP4	TCTGACAAGGACGAGGGTG	CTCGAATTTTGGCGAAGTG
